# Supplementary material for: Procalcitonin levels in septic and nonseptic subjects with AKI and ESKD prior to and during continuous kidney replacement therapy (CKRT)
Source: Research Square preprint supplement (doi:10.21203/rs.3.rs-5948541/v1), 2025-03-27
Supplement: Supplementary file 1 [file 14fbe2b545d23ed5160dd754.xlsx]

## Sheet: Patient Table
ID	AKI/ESKD	Septic status	Culture source	Suspected site of infection	Organism(s)	Pre Procal	D1 Procal	D2 Procal	D3 Procal
1	AKI	Septic	Blood	Wound	E. coli and K. pneumoniae	58.06	42.12	30.65	20.24
2	AKI	Septic	Pelvic abscess	Surgical drain	S. anginosus, E. raffinosus, and B. fragilis	310.91	422.43	436.58	243.05
3	AKI	Septic	Blood	Lung	S. pneumoniae	183.53	169.28	237.52	181.89
4	AKI	Septic	Blood	Lung	P. aeruginosa	207.51	n/a	n/a	n/a
5	AKI	Septic	Blood	Wound	P. mirabilis, C. amalonaticus, E. faecalis, Peptoniphilus sp., K. pneumoniae, and S. anginosus	4.18	n/a	n/a	n/a
6	AKI	Septic	Blood	Lung	B. fragilis	12.56	8.65	7.11	7.5
7	AKI	Septic	Blood	Abscess	K. pneumoniae	87.84	188.34	144.69	86.22
8	AKI	Septic	Blood	Gut translocation	C. ramosum and G. adiacens	1.41	1.31	1.66	1.7
9	AKI	Septic	Blood	Dental	G. hemolysans	9.54	n/a	n/a	n/a
10	AKI	Nonseptic	n/a	n/a	n/a	49.33	30.57	19.39	11.22
11	AKI	Nonseptic	n/a	n/a	n/a	8.89	9.6	8.71	5.83
12	AKI	Nonseptic	n/a	n/a	n/a	11.52	5.93	7.93	n/a
13	AKI	Nonseptic	n/a	n/a	n/a	30.73	24.95	16.57	7.82
14	AKI	Nonseptic	n/a	n/a	n/a	5.62	3.78	1.64	n/a
15	AKI	Nonseptic	n/a	n/a	n/a	5.61	7.62	7.77	6.39
16	AKI	Nonseptic	n/a	n/a	n/a	25.01	20.05	14.57	11.39
17	AKI	Nonseptic	n/a	n/a	n/a	1.15	0.7	32.58	36.11
18	AKI	Nonseptic	n/a	n/a	n/a	0.49	n/a	n/a	n/a
19	AKI	Nonseptic	n/a	n/a	n/a	0.82	n/a	n/a	n/a
20	AKI	Nonseptic	n/a	n/a	n/a	20.97	n/a	n/a	n/a
21	AKI	Nonseptic	n/a	n/a	n/a	1.98	n/a	n/a	n/a
22	AKI	Nonseptic	n/a	n/a	n/a	2.19	n/a	n/a	n/a
23	AKI	Nonseptic	n/a	n/a	n/a	1.3	n/a	n/a	n/a
24	AKI	Nonseptic	n/a	n/a	n/a	4.45	n/a	n/a	n/a
25	AKI	Nonseptic	n/a	n/a	n/a	12.72	n/a	n/a	n/a
26	ESKD	Septic	Pleural fluid	Lung	C. perfringens	278.51	n/a	n/a	n/a
27	ESKD	Septic	Sputum	Lung	MRSA	3.63	14.15	9.66	6.62
28	ESKD	Septic	Peritoneal fluid	Dialysis catheter	C. albicans	3.75	19.61	20.88	8.69
29	ESKD	Septic	Unclear (outside hospital)*	Lung	Unclear (outside hospital)*	0.66	0.84	0.6	n/a
30	ESKD	Nonseptic	n/a	n/a	n/a	0.25	0.38	0.54	0.68
31	ESKD	Nonseptic	n/a	n/a	n/a	2.54	1.45	0.83	0.88
32	ESKD	Nonseptic	n/a	n/a	n/a	0.69	n/a	n/a	n/a
33	ESKD	Nonseptic	n/a	n/a	n/a	9.28	14.75	12.29	18.78
35	ESKD	Nonseptic	n/a	n/a	n/a	11.55	n/a	n/a	n/a
34	ESKD	Nonseptic	n/a	n/a	n/a	4.44	10.29	8.17	n/a
36	ESKD	Nonseptic	n/a	n/a	n/a	3.75	1.45	0.91	n/a
37	ESKD	Nonseptic	n/a	n/a	n/a	2.89	1.84	0.9	n/a
38	ESKD	Nonseptic	n/a	n/a	n/a	0.38	0.24	0.19	n/a
39	ESKD	Nonseptic	n/a	n/a	n/a	21.03	18.04	11.79	n/a
40	ESKD	Nonseptic	n/a	n/a	n/a	5.37	n/a	n/a	n/a
41	ESKD	Nonseptic	n/a	n/a	n/a	2.74	1.45	0.93	0.63
