# Supplementary material for: Procalcitonin levels in septic and nonseptic subjects with AKI and ESKD prior to and during continuous kidney replacement therapy (CKRT)
Source: Research Square preprint supplement (doi:10.21203/rs.3.rs-5948541/v1), 2025-03-27
Supplement: Supplementary file 2 [file 155ac77c373ed3324b27db24.xlsx]

## Sheet: Sheet1
AKI
CKRT parameters	Pre CKRT	Day 1	Day 2	Day 3
Dose, mL/kg/h	n/a	20.46 (15.71-23.86)	21.58 (16.58-26.65)	20.66 (18.06-24.07)
Time on CKRT, h	n/a	16.7 (11.38-20.5)	23 (20.5-24)	20.4 (18.83-23.35)
Total effluent volume, L	n/a	31.49 (23.27-40.01)	43.14 (33.38-54.74)	37.56 (29.66-47.55)
Procalcitonin values during CKRT
Plasma procalcitonin, ng/mL	9.54 (2.08-40.03)	9.23 (5.39-66.50)	15.57 (7.61-60.61)	11.31 (6.67-73.69)
Effluent procalcitonin, ng/mL	n/a	2.15 (0.70-16.55)	3.09 (1.41-20.55)	3.19 (1.96-20.31)
Sieving coefficient procalcitonin	n/a	0.24 (0.19-0.31)	0.26 (0.20-0.32)	0.26 (0.23-0.36)
Procalcitonin CKRT clearance, L	n/a	6.08 (3.97-10.2)	12.34 (7.92-17.37)	11.08 (9.18-14.46)
Procalcitonin CKRT mass removal, ug	n/a	63.97 (16.16-196)	152.1 (54.36-808)	167.2 (89.04-669.1)
Creatinine values during CKRT
Plasma creatinine, mg/dL	2.42 (1.86-3.53)	1.99 (1.43-2.62)	1.72 (1.12-2.07)	1.43 (0.96-1.99)
Effluent creatinine, mg/dL	n/a	1.58 (0.98-2.56)	1.56 (1.02-1.84)	1.32 (1.12-1.57)
Sieving coefficient creatinine	n/a	0.87 (0.71-0.91)	0.85 (0.8-1.01)	0.91 (0.83-1.01)
Creatinine CKRT clearance, L	n/a	22.88 (10.48-34.51)	34.07 (11.27-50.3)	26.58 (0-38.89)
Creatinine CKRT mass removal, mg	n/a	394.7 (131-790.3)	585.9 (111.6-877.7)	397.1 (0-687.2)
