# Supplementary material for: Procalcitonin levels in septic and nonseptic subjects with AKI and ESKD prior to and during continuous kidney replacement therapy (CKRT)
Source: Research Square preprint supplement (doi:10.21203/rs.3.rs-5948541/v1), 2025-03-27
Supplement: Supplementary file 3 [file 1910c67f93f085424abc8957.xlsx]

## Sheet: Sheet1
​	​	​		AKI		ESKD
Threshold (ng/mL)​	Reference​	Population​	Clinical Setting	Sensitivity​	Specificity​	Sensitivity​	Specificity​
0.5​	Clinical standard​	​n/a	n/a	100%​	6%​	100%​	17%​
0.75​	Lee et al.​	ESKD​	Inpatient	100%​	6%​	75%​	25%​
1.5​	Bowman et al.​	AKI​	Inpatient	89%​	25%​	75%​	25%​
1.75​	Bowman et al.​	ESKD​	Inpatient	89%​	25%​	75%​	25%​
2.86	Han et al.	AKI	Inpatient	0.89	0.38	0.75	0.42
3.2​	El-sayed et al.​	ESKD​	ICU	89%​	38%​	75%​	50%​
