# Supplementary material for: Procalcitonin levels in septic and nonseptic subjects with AKI and ESKD prior to and during continuous kidney replacement therapy (CKRT)
Source: Research Square preprint supplement (doi:10.21203/rs.3.rs-5948541/v1), 2025-03-27
Supplement: Supplementary file 4 [file a9c0b13a147cfb1ae78c561a.xlsx]

## Sheet: Sheet1
​	Control​	AKI​		ESKD​
​	​	Nonseptic​	Septic​	Nonseptic​	Septic​
Total patients​	9	16	9	12	4
Age​	58 (52.5-65)	49 (34-60)	67 (59.5-73)	60 (53-70)	66 (55.5-76.5)
Male (%)​	5 (56)	9 (56)	5 (56)	7 (58)	3 (75)
Female (%)​	4 (44)	7 (44)	4 (44)	5 (42)	1 (25)
Baseline Cr (mg/dL)​	0.84 (0.72-0.99)	0.94 (0.81-1.20)	0.72 (0.53-0.89)	ESKD​	ESKD​
Baseline eGFR (mL/min/1.73 m2)​	92 (85-100)	84 (72-110)	98 (79-108)	ESKD​	ESKD​
Duration of AKI, hrs (IQR)​	N/A​	34 (4-54)	40 (33-68)	ESKD​	ESKD​
Pre-CKRT creatinine (mg/dL)	N/A	2.60 (1.86-3.74)	2.27 (1.79-3.18)	6.00 (4.07-7.65)	6.12 (3.38-8.82)
SOFA score, average (IQR)​	N/A​	11 (7.25-13)	10 (9.5-12.5)	5 (3.25-10.50)	9.50 (9-12.25)
Delayed graft function (%)​	N/A​	N/A​	N/A​	2 (17)	N/A​
Comorbidities (%)​
HTN​	5 (56)	9 (56)	7 (78)	5 (42)	1 (25)
DM​	3 (33)	2 (13)	4 (44)	4 (33)	4 (100)
CHF​	0 (0)	10 (63)	6 (67)	2 (17)	2 (50)
CAD ​	1 (11)	4 (25)	2 (22)	4 (33)	2 (50)
Cirrhosis​	0 (0)	0 (0)	0 (0)	1 (8)	0 (0)
COPD​	2 (22)	0 (0)	2 (22)	2 (17)	1 (25)
Alcohol use disorder	0 (0)	0 (0)	0 (0)	1 (8)	0 (0)
Solid cancer​	3 (33)	0 (0)	2 (22)	1 (8)	1 (25)
Hematologic cancer​	0 (0)	0 (0)	5 (56)	0 (0)	0 (0)
CVA/TIA​	0 (0)	2 (13)	2 (22)	0 (0)	0 (0)
