# Supplementary material for: Procalcitonin levels in septic and nonseptic subjects with AKI and ESKD prior to and during continuous kidney replacement therapy (CKRT)
Source: Research Square preprint supplement (doi:10.21203/rs.3.rs-5948541/v1), 2025-03-27
Supplement: Supplementary file 5 [file e043b22a8fd301b5d147afef.xlsx]

## Sheet: Sheet1
ESKD
CKRT parameters	Pre CKRT	Day 1	Day 2	Day 3
Dose, mL/kg/h	n/a	19.07 (15.01-23.12)	20.81 (17.74-23.86)	21.50 (17.76-24.15)
Time on CKRT, h	n/a	16.3 (12.33-20.8)	23.5 (8.125-24)	11.5 (0-22.28)
Total effluent volume, L	n/a	27.49 (21.59-34.83)	41.26 (14.64-45.76)	22.94 (0-41.25)
Procalcitonin values during CKRT
Plasma procalcitonin, ng/mL	3.69 (1.15-8.30)	1.67 (1.30-14.30)	0.92 (0.66-11.26)	3.75 (0.67-11.21)
Effluent procalcitonin, ng/mL	n/a	0.78 (0.27-2.73)	0.37 (0.17-2.76)	0.47 (0.16-2.72)
Sieving coefficient procalcitonin	n/a	0.22 (0.14-0.27)	0.24 (0.2-0.31)	0.19 (0.13-0.35)
Procalcitonin CKRT clearance, L	n/a	7.11 (3.65-8.46)	11.16 (9-13.28)	8 (6.43-13.65)
Procalcitonin CKRT mass removal, ug	n/a	18.73 (6.909-106.9)	13.88 (7.47-117.6)	26.52 (6.628-108.9)
Creatinine values during CKRT
Plasma creatinine, mg/dL	5.99 (3.69-8.48)	3.16 (2.29-4.19)	2.47 (1.82-3.07)	2.86 (1.46-3.31)
Effluent creatinine, mg/dL	n/a	2.3 (1.85-3.89)	2.36 (1.77-2.64)	1.67 (1.12-1.98)
Sieving coefficient creatinine	n/a	0.85 (0.68-1)	0.87 (0.84-1.33)	0.82 (0.68-0.96)
Creatinine CKRT clearance, L	n/a	27.14 (16.34-34.03)	38.12 (33.94-62.3)	29.88 (22.7-46.98)
Creatinine CKRT mass removal, mg	n/a	768.3 (516.1-1234)	1034 (809.6-1080)	608.4 (421.9-791.7)
